# Supplementary material for: Sex peptide targets distinct higher order processing neurons in the brain to induce the female post-mating response
Source: eLife. 2026 Feb 10;13:RP98283. doi: 10.7554/eLife.98283 (PMC12890249; doi:10.7554/eLife.98283)
Supplement: Figure 1—source data 1. [file elife-98283-fig1-data1.xlsx]

## Sheet: Sheet1
Figure 1-source data 1: Quantitative results used to generate graphs in Figure 1C and D.
						controls
Wildtype (Virgin)	Wildtype (Mated)	nsyb GAL4 x UASmSP	Head GAL4 x UASmSP	Trunk GAL4 x UASmSP		UASmSP	nsyb GAL4	Head GAL4	Trunk GAL4
0	7.142	13.33	9.52	91.67		100	95.23	100	95.23
0	6.25	0	28.57	95		100	100	100	100
0	13.33	0	14.29	88		100	100	100	95.23
Wildtype (Virgin)	Wildtype (Mated)	nsyb GAL4 x UASmSP	Head GAL4 x UASmSP	Trunk GAL4 x UASmSP		UASmSP	nsyb GAL4	Head GAL4	Trunk GAL4
0	12	73	0	67		0	0	0	0
0	46	46	0	67		0	0	0	1
0	21	69	0	70		0	0	0	0
0	56	56	0	45		0	0	0	0
0	51	51	0	64		0	0	0	0
0	21	21	0	63		0	0	0	0
0	51	51	0	65		0	0	0	0
0	48	48	0	58		0	0	0	3
0	53	53	0	31		0	0	0	0
0	30	30	0	59		2	0	0	0
0	23	72	0	60		0	0	0	0
0	29	29	0	84		0	0	0	0
0	51	51	0	69		0	0	0	0
0	33	73	0	86		0	0	0	0
0	44	44	0	65		0	0	0	0
0	40	40	0	88		1	0	0	0
0	16	86	0	82		0	0	0	0
0	71	71	0	71		0	0	0	0
0	58	58	0	70		0	0	0	0
0	26	0	0	44		0	1	0	1
0	55	55	0	48		0	0	0	0
0	47	47	0	48		0	0	0	0
0	21	67	0	57		0	0	0	0
0	56	56	0	51		0	0	0	0
0	49	49	0	57		0	0	0	0
0	44	44	0	51		0	0	0	0
0	31	70	0	55		0	0	0	1
0	26	26	0	49		0	1	0	0
0	31	31	0	60		0	0	0	0
0	45	45	0	47		0	0	0	0
