# Supplementary material for: Sex peptide targets distinct higher order processing neurons in the brain to induce the female post-mating response
Source: eLife. 2026 Feb 10;13:RP98283. doi: 10.7554/eLife.98283 (PMC12890249; doi:10.7554/eLife.98283)
Supplement: Figure 2—source data 1. [file elife-98283-fig2-data1.xlsx]

## Sheet: Sheet1
Figure 2-source data 1: Quantitative results used to generate graphs in Figure 2D and E.
									controls
Wildtype (Virgin)	Wildtype (Mated)	nsyb GAL4 x UASmSP	SPR8 GAL4 x UASmSP	SPR12 GAL4 x UASmSP	fru11 GAL4 x UASmSP	fru12 GAL4 x UASmSP	dsx24 GAL4 x UASmSP		SPR8 GAL4	SPR12 GAL4	fru11 GAL4	fru12 GAL4	dsx24 GAL4
93.33	0	13.33	20	95	0	40	38.09		93.33	100	100	95.23	100
93.33	5.55	13.33	15	95	15	55	47.3		100	100	100	100	100
93.75	13.33	0	21.74	82.61	10	34.78	61.9		100	100	100	100	100
Wildtype (Virgin)	Wildtype (Mated)	nsyb GAL4 x UASmSP	SPR8 GAL4 x UASmSP	SPR12 GAL4 x UASmSP	fru11 GAL4 x UASmSP	fru12 GAL4 x UASmSP	dsx24 GAL4 x UASmSP		SPR8 GAL4	SPR12 GAL4	fru11 GAL4	fru12 GAL4	dsx24 GAL4
0	54	44	24	0	67	32	45		0	0	0	0	0
0	32	31	36	28	67	47	35		0	0	0	0	0
0	36	30	22	17	70	49	0		0	0	0	0	0
0	31	46	23	25	45	49	29		0	0	0	0	0
0	38	51	21	12	64	40	91		0	0	0	0	0
0	46	59	33	44	63	101	79		0	0	0	0	0
0	23	35	28	0	65	0	51		0	0	0	0	0
0	10	42	14	23	58	43	45		0	0	0	0	0
0	34	33	61	26	31	0	13		0	0	0	0	0
0	44	39	29	26	59	77	73		0	0	0	0	0
0	35	28	24	2	60	116	37		0	0	0	0	0
1	31	22	15	18	84	25	23		0	0	0	0	0
0	36	45	11	18	69	63	24		0	0	0	0	0
0	26	70	18	13	86	91	88		0	0	0	0	0
0	15	18	23	48	65	0	45		0	0	0	0	0
0	54	39	36	7	88	0	46		0	0	0	0	0
0	62	21	42	13	82	24	27		0	0	0	0	0
0	39	32	79	21	71	0	32		0	2	0	0	0
0	43	62	41	19	70	73	29		0	0	0	0	0
0	5	30	17	52	44	0	82		0	0	0	0	0
0	31	35	29	0	48	34	0		0	0	0	0	0
0	45	39	41	41	48	45	69		0	0	0	0	0
0	25	56	34	37	57	17	54		0	0	0	0	0
0	29	42	8	5	51	55	23		0	0	0	0	0
0	34	18	12	0	57	0	59		0	0	0	0	0
0	33	20	31	12	51	90	53		0	0	0	0	0
0	57	6	31	41	55	52	79		1	0	0	0	0
0	11	21	32	17	49	48	77		0	0	0	0	0
0	23	34	34	36	60	63	41		0	0	0	0	0
1	59	11	37	35	47	15	24		0	0	0	0	1
