# Supplementary material for: Sex peptide targets distinct higher order processing neurons in the brain to induce the female post-mating response
Source: eLife. 2026 Feb 10;13:RP98283. doi: 10.7554/eLife.98283 (PMC12890249; doi:10.7554/eLife.98283)
Supplement: Figure 3—source data 1. [file elife-98283-fig3-data1.xlsx]

## Sheet: Sheet1
Figure 3-source data 1: Quantitative results used to generate graphs in Figure 3A and B.
Receptivity %
Virgin	Mated	SPSN 1 x UASmSP	SPSN 2 x UASmSP	SPR3 x UASmSP	SPR21 x UASmSP		SPSN1 (86834) VTO58873AD;VT003280DBD
94 (N = 27)	3.7 (N = 27)	0 (N=30)	0 (N=30)	99	98		SPSN2 (86870) VT058873AD;VT033490DBD
99 (N= 30)	6.66 (N= 30)	0 (N=32)	0 (N=30)	97	95
95 (N=28)	3.5 (N=28)	0 (N=16)	0 (N=16)	98	99
Oviposition
Virgin	Mated	SPSN 1 x UASmSP	SPSN 2 x UASmSP	SPR3 x UASmSP	SPR21 x UASmSP
0	48	30	20	0	0
0	44	44	48	0	10
0	42	38	55	0	0
0	22	38	33	0	0
0	46	29	42	0	13
0	32	32	23	0	0
0	42	55	37	0	0
0	54	51	32	0	0
0	63	37	39	0	0
0	34	58	44	0	0
0	40	42	46	0	0
0	51	29	39	0	0
0	37	36	32	0	0
0	40	22	41	0	0
0	32	33	36	0	0
0	11	37	34	0	0
0	41	44		0	0
0	9	45		0	0
0	37			0	0
0	40			0	0
0	53			0
0	47			0
0	29			0
0	35			0
0	28			0
0	46			0
0	33			0
0	23			0
0	22			0
0	17			0
0	19
0	25
