# Supplementary material for: Sex peptide targets distinct higher order processing neurons in the brain to induce the female post-mating response
Source: eLife. 2026 Feb 10;13:RP98283. doi: 10.7554/eLife.98283 (PMC12890249; doi:10.7554/eLife.98283)
Supplement: Figure 4—source data 1. [file elife-98283-fig4-data1.xlsx]

## Sheet: Sheet1
Figure 4-source data 1: Quantitative results used to generate graphs in Figure 4A and B.
										controls
Wildtype (Virgin)	Wildtype (Mated)	nsyb GAL4 x UASmSP	FD1 GAL4 x UASmSP	FD2 GAL4 x UASmSP	FD3 GAL4 x UASmSP	FD4 GAL4 x UASmSP	FD5 GAL4 x UASmSP	FD6 GAL4 x UASmSP		FD1 GAL4	FD2 GAL4	FD3 GAL4	FD4 GAL4	FD5 GAL4	FD6 GAL4
93.33	7.142	13.33	100	95.24	86.67	80.95	95.24	6.67		100	100	100	100	100	100
80	6.25	13.33	95.24	95.24	80	86.67	100	0		93.33	100	95.23	100	100	100
100	5.55	6.667	100	100	86.67	92.86	100	0		100	100	100	100	100	100
Wildtype (Virgin)	Wildtype (Mated)	nsyb GAL4 x UASmSP	FD1 GAL4 x UASmSP	FD2 GAL4 x UASmSP	FD3 GAL4 x UASmSP	FD4 GAL4 x UASmSP	FD5 GAL4 x UASmSP	FD6 GAL4 x UASmSP		FD1 GAL4	FD2 GAL4	FD3 GAL4	FD4 GAL4	FD5 GAL4	FD6 GAL4
0	39	49	0	9	0	40	10	14		0	0	0	0	0	1
0	31	38	0	0	52	0	0	61		0	0	0	0	0	0
0	34	33	27	12	64	2	13	20		0	0	0	0	0	0
0	17	23	0	46	21	53	0	19		0	0	0	0	0	0
0	24	32	0	0	0	14	14	34		0	0	0	1	0	0
0	32	47	0	1	25	36	15	62		0	0	0	0	0	0
0	45	33	46	97	72	0	23	32		0	0	0	0	0	0
0	36	5	0	0	0	52	0	35		0	0	0	0	0	0
0	45	59	0	0	1	64	24	16		0	0	0	0	0	0
0	41	65	0	19	43	58	0	39		0	0	0	0	0	0
0	21	37	0	36	51	0	0	24		0	0	0	0	2	0
0	27	32	0	0	45	32	11	26		0	1	0	0	0	1
0	25	36	0	0	83	40	1	9		0	0	0	0	0	0
0	43	30	28	0	21	38	0	62		0	0	0	0	0	0
0	12	41	34	82	52	0	35	55		0	0	0	0	0	0
0	36	20	13	56	0	53	29	41		2	0	0	0	0	0
2	8	26	0	0	40	1	38	72		0	0	0	0	3	0
0	33	33	0	28	45	65	23	14		0	0	0	0	0	0
0	40	27	0	0	0	21	0	53		0	0	1	0	0	0
0	13	31	29	0	0	49	26	11		0	0	0	0	0	0
0	59	23	14	7	38	54	0	31		0	0	0	0	0	0
0	41	23	0	0	0	22	0	17		0	0	1	0	0	0
0	30	45	0	52	29	7	0	13		0	0	0	0	0	0
0	33	68	42	0	57	64	0	80		0	0	0	0	0	0
0	28	31	38	0	49	31	23	78		0	0	0	0	0	0
0	56	26	0	0	33	9	0	15		0	0	0	0	0	0
0	62	49	0	53	26	36	0	26		0	0	0	0	0	0
0	3	52	13	0	0	41	0	15		0	0	0	0	0	0
3	51	8	0	0	52	0	0	20		0	0	0	0	0	0
0	22	51	26	0	46	38	0	26		0	0	0	0	0	0
