# Supplementary material for: Sex peptide targets distinct higher order processing neurons in the brain to induce the female post-mating response
Source: eLife. 2026 Feb 10;13:RP98283. doi: 10.7554/eLife.98283 (PMC12890249; doi:10.7554/eLife.98283)
Supplement: Figure 5—source data 1. [file elife-98283-fig5-data1.xlsx]

## Sheet: Sheet1
Figure 5-source data 1: Quantitative results used to generate graphs in Figure 5B and C.
									controls
Wildtype (Virgin)	Wildtype (Mated)	nsyb GAL4 x UASmSP	SPR8 - Fru11/12 x UASmSP	SPR8 - dsx x UASmSP	Fru11/12 - dsx x UASmSP	SPR8 - FD6 x UASmSP	fru11/12 - FD6 x UASmSP		SPR8AD	fru11/12	fru11/12DBD	dsxDBD	FD6DBD	SPR8 - Fru11/12	SPR8 - dsx	Fru11/12 - dsx	SPR8 - FD6	fru11/12 - FD6
100	0	0	16.67	0	6.67	10.53	0		100	100	100	100	100	93.33	100	93.33	100	100
93.75	5.55	0	25	22.22	13.33	0	0		100	100	100	100	100	100	100	100	100	100
93.33	0	6.667	8.33	0	25	0	0		100	95.23	100	100	100	100	100	95.23	100	100
			6.25	0
Wildtype (Virgin)	Wildtype (Mated)	nsyb GAL4 x UASmSP	SPR8 - Fru11/12 x UASmSP	SPR8 - dsx x UASmSP	Fru11/12 - dsx x UASmSP	SPR8 - FD6 x UASmSP	fru11/12 - FD6 x UASmSP		SPR8AD	fru11/12AD	fru11/12DBD	dsxDBD	FD6DBD	SPR8 - Fru11/12	SPR8 - dsx	Fru11/12 - dsx	SPR8 - FD6	fru11/12 - FD6
0	45	65	49	46	49	32	18		0	0	0	0	0	0	0	0	0	0
0	41	31	52	51	43	16	21		0	0	0	0	0	0	0	0	0	0
1	41	35	26	61	68	32	46		0	0	0	0	0	0	0	0	1	0
1	20	43	31	64	57	18	16		0	0	0	0	0	0	0	0	0	0
0	36	47	39	55	51	24	35		0	0	0	0	0	0	0	0	0	0
1	39	24	24	37	45	35	30		0	1	0	0	0	0	0	0	0	2
1	22	49	25	49	55	21	38		0	0	0	0	0	0	0	0	0	0
0	55	31	26	50	53	27	40		0	0	0	0	0	0	2	0	1	0
0	15	38	29	28	69	38	1		0	0	0	0	0	0	0	0	0	0
0	31	15	25	74	85	25	35		0	0	0	0	0	0	0	0	0	0
1	38	30	13	48	74	27	1		0	0	0	0	0	0	0	0	0	0
0	30	21	41	73	56	43	4		0	0	0	0	0	0	0	0	0	0
0	27	43	34	47	63	25	7		0	0	0	0	0	0	0	0	0	0
0	59	41	11	27	77	25	32		0	0	0	1	0	0	0	0	0	0
0	44	36	36	55	67	36	27		0	0	0	0	0	0	0	0	0	0
0	32	38	40	29	71	25	18		0	0	0	0	0	2	0	0	0	0
0	56	41	49	55	80	31	20		0	0	0	0	0	0	0	0	0	0
6	12	42	47	37	76	0	31		0	2	0	0	0	0	0	0	0	0
0	38	60	32	44	23	37	25		0	0	0	0	0	0	0	0	0	0
0	23	31	19	61	17	28	25		0	0	0	0	0	0	0	0	0	0
0	33	35	37	69	64	25	27		0	0	0	0	0	0	0	0	0	0
0	53	36	44	32	57	26	5		0	0	0	0	0	0	0	0	0	1
0	14	42	19	74	58	28	5		0	0	0	0	0	0	0	0	0	0
0	40	51	51	74	72	36	28		0	0	0	0	0	0	0	0	0	0
1	33	18	21	59	43	25	20		0	0	0	0	0	0	0	0	0	0
0	25	8	42	32	49	12	52		0	0	0	0	0	0	0	0	0	0
0	28	31	37	43	41	32	33		0	1	0	0	0	0	0	0	0	1
0	41	33	45	57	74	26	40		0	0	0	0	0	0	0	0	0	0
0	55	56	46	43	75	37	14		0	0	0	0	0	0	0	0	0	0
1	43	11	49	63	49	5	43		0	0	0	0	0	0	0	0	0	1
