# Supplementary material for: Sex peptide targets distinct higher order processing neurons in the brain to induce the female post-mating response
Source: eLife. 2026 Feb 10;13:RP98283. doi: 10.7554/eLife.98283 (PMC12890249; doi:10.7554/eLife.98283)
Supplement: Figure 6—source data 1. [file elife-98283-fig6-data1.xlsx]

## Sheet: Sheet1
Figure 6-source data 1: Quantitative results used to generate graphs in Figure 6A and B.
															controls
Wildtype (Virgin)	Wildtype (Mated)	DfSPR/SPR[m] SPR8 - dsx - StopmSP	DfSPR/SPR[m] fru11/12 - dsx - StopmSP	DfSPR/SPR[m] SPR8 - fru11/12 - StopmSP	SPR8 - dsx - SPR RNAi (virgin)	fru11/12 - dsx - SPR RNAi (virgin)	SPR8 - fru11/12 - SPR RNAi (virgin)	SPR8 - dsx - SPR RNAi (Mated)	fru11/12 - dsx - SPR RNAi (Mated)	SPR8 - fru11/12 - SPR RNAi (Mated)	SPR8 - dsx - SPR RNAi - mSP	fru11/12 - dsx - SPR RNAi - mSP	SPR8 - fru11/12 - SPR RNAi - mSP		UAS SPR RNAi	SPR[m]	DfSPR
100	13.33	52.38	81.25	25	26.7	70	75	44.4	100	50	33.3	85	84.2		100	100	100
100	6.25	90.47	80.95	33.33	20	94.7	65.4	30	94.7	55.6	42.1	52.4	71.4		100	100	100
100	13.33	71.43	85.71	38.1	34.4	85	100	50	82.3	55	23.8	33.3	76.2		100	100	100
					0
Wildtype (Virgin)	Wildtype (Mated)	DfSPR/SPR[m] SPR8 - dsx - StopmSP	DfSPR/SPR[m] fru11/12 - dsx - StopmSP	DfSPR/SPR[m] SPR8 - fru11/12 - StopmSP	SPR8 - dsx - SPR RNAi (virgin)	fru11/12 - dsx - SPR RNAi (virgin)	SPR8 - fru11/12 - SPR RNAi (virgin)	SPR8 - dsx - SPR RNAi (Mated)	fru11/12 - dsx - SPR RNAi (Mated)	SPR8 - fru11/12 - SPR RNAi (Mated)	SPR8 - dsx - SPR RNAi - mSP	fru11/12 - dsx - SPR RNAi - mSP	SPR8 - fru11/12 - SPR RNAi - mSP		UAS SPR RNAi	SPR[m]	DfSPR
0	11	17	0	33	10	28	8	26	12	3	10	14	12		0	0	1
0	36	17	0	18	1	22	11	21	7	8	12	12	8		0	0	0
0	45	24	1	18	11	1	0	10	25	3	18	3	0		0	0	0
1	33	0	0	55	5	0	0	2	23	18	15	17	3		0	0	0
0	36	0	27	19	1	0	0	9	16	3	9	0	17		0	0	0
0	21	0	0	0	0	0	0	3	25	10	9	0	10		0	0	0
0	29	9	0	35	0	0	0	2	2	4	15	0	0		0	0	0
0	53	0	0	37	0	0	0	1	12	0	0	0	1		0	0	0
1	46	0	0	26	0	0	0	25	1	0	11	0	5		0	0	1
1	30	39	0	41	0	0	0	0	6	0	0	0	5		0	0	0
0	43	32	0	16	6	3	4	2	1	16	7	15	2		0	2	0
0	46	0	0	46	1	1	7	12	0	7	19	2	0		0	0	0
0	37	0	0	43	0	1	2	25	0	14	17	0	4		0	0	0
1	39	1	0	0	0	1	3	20	0	2	27	0	5		0	0	0
0	33	33	0	13	0	0	0	7	0	3	23	0	0		1	0	0
0	40	0	20	37	0	0	0	3	0	0	0	0	0		0	0	0
0	51	54	0	42	0	0	0	16	0	0	15	0	0		0	0	3
0	59	0	0	0	0	0	0	8	0	0	11	0	2		0	0	0
0	56	0	0	35	0	0	0	27	0	0	14	0	3		0	1	0
0	47	19	0	25	0	0	0	19	0	0	19	0	0		0	1	0
4	41	33	0	37											0	0	0
0	33	27	0	0											0	0	0
0	18	0	39	39											1	0	0
0	33	30	0	0											0	0	0
0	40	0	0	21											0	0	0
0	44	0	0	41											0	0	1
0	51	0	0	5											0	0	0
2	42	0	0	34											0	1	0
0	62	0	0	48											0	0	0
0	24	0	0	39											0	0	0
