# Supplementary material for: Sex peptide targets distinct higher order processing neurons in the brain to induce the female post-mating response
Source: eLife. 2026 Feb 10;13:RP98283. doi: 10.7554/eLife.98283 (PMC12890249; doi:10.7554/eLife.98283)
Supplement: Figure 7—source data 1. [file elife-98283-fig7-data1.xlsx]

## Sheet: Sheet1
Figure 7-source data 1: Quantitative results used to generate graphs in Figure 7C and D.
												controls
Wildtype (Virgin)	Wildtype (Mated)	SPR8 - dsx - StopmSP	fru11/12 - dsx - StopmSP	SPR8 - fru11/12 - StopmSP	SPR8 - dsx - StopTrpA1	fru11/12 - dsx - StopTrpA1	SPR8 - fru11/12 - StopTrpA1	SPR8 - dsx - StopTNT	fru11/12 - dsx - StopTNT	SPR8 - fru11/12 - StopTNT		otdflp	UAS StopmSP	UAS StopTrpA1	UAS StopTNT
100	7.142	16.66	62.5	40	20	40	5	80	100	80		100	100	93.33	100
93.33	7.142	30	57.14	35	0	5	10	73.68	95	85		100	93.33	100	100
93.75	9.52	5.56	61.9	30	5	5	5	85	100	90		100	95.23	95.23	100
Wildtype (Virgin)	Wildtype (Mated)	SPR8 - dsx - StopmSP	fru11/12 - dsx - StopmSP	SPR8 - fru11/12 - StopmSP	SPR8 - dsx - StopTrpA1	fru11/12 - dsx - StopTrpA1	SPR8 - fru11/12 - StopTrpA1	SPR8 - dsx - StopTNT	fru11/12 - dsx - StopTNT	SPR8 - fru11/12 - StopTNT		otdflp	UAS StopmSP	UAS StopTrpA1	UAS StopTNT
0	40	41	0	21	33	13	40	11	0	0		0	0	0	0
0	41	26	0	0	20	26	31	6	0	0		0	0	0	0
0	36	11	0	0	76	15	40	1	0	0		0	0	0	0
0	39	21	2	0	50	68	32	9	0	0		0	0	0	0
0	31	23	0	30	38	67	80	0	0	0		0	1	0	0
0	36	0	1	0	81	33	45	0	0	0		0	0	0	0
0	26	14	0	0	71	21	88	0	0	0		0	1	0	0
0	21	13	0	0	79	36	53	0	0	0		0	0	0	0
0	55	25	0	4	82	22	65	0	0	0		0	0	0	0
0	31	12	0	0	58	36	73	0	0	0		0	0	0	0
0	16	8	0	0	80	60	63	19	0	0		0	1	0	0
0	33	19	0	21	70	42	51	22	0	0		0	0	0	0
0	48	9	0	26	64	36	47	19	0	0		0	0	0	0
0	31	19	0	0	72	43	21	3	0	0		0	3	0	0
0	11	5	0	0	87	24	78	10	0	0		1	0	0	0
0	60	1	0	0	33	37	51	4	0	0		0	0	0	0
0	31	12	0	36	38	43	23	7	8	0		0	1	0	0
1	19	30	0	0	79	44	39	3	0	0		0	0	0	0
0	46	27	0	0	68	38	27	0	0	0		0	0	0	0
0	42	33	6	43	64	18	57	0	0	0		0	0	0	0
0	33	47	0	0								1	0	0	0
0	31	39	0	0								0	1	0	0
0	54	21	0	34								0	1	0	0
0	52	39	0	0								1	1	0	0
0	44	25	0	0								0	0	0	0
0	48	3	0	0								0	0	1	0
0	31	53	0	32								0	0	0	0
0	39	46	0	0								0	0	0	0
0	14	26	0	27								0	0	1	0
0	44	23	0	0								1	0	0	0
