# Supplementary material for: Sex peptide targets distinct higher order processing neurons in the brain to induce the female post-mating response
Source: eLife. 2026 Feb 10;13:RP98283. doi: 10.7554/eLife.98283 (PMC12890249; doi:10.7554/eLife.98283)
Supplement: Figure 8—source data 1. [file elife-98283-fig8-data1.xlsx]

## Sheet: Sheet1
Figure 8-source data 1: Quantitative results used to generate graphs in Figure 8A, B, O and P.
S7A
Receptivity %
Virgin	Mated	SPSNAD x CS	VT058873AD;SPR8DBD x UASmsp	VT058873AD;Fru11/12DBD x UASmsp	VT058873AD;dsxDBD x UASmsp
94 (N = 27)	3.22 (N = 27)	0 (N=30)	0 (N =25)	6.7 (N=30)	46.5 (N=30)
99 (N= 30)	4.11 (N= 30)	6.6 (n=28)	3.5 (N =28	8 (N=25)	39 (N=18)
95 (N=28)	9.46 (N=28)	3.33 (N= 30)	4.5 (N=22)	10 (30)	35 (N=28)
S7B
Oviposition
Virgin	Mated	SPSNAD x CS	VT058873AD;SPR8DBD x UASmsp	VT058873AD;Fru11/12DBD x UASmsp	VT058873AD;dsxDBD x UASmsp
0	48	47	24	28	34
0	44	44	25	29	30
0	42	40	34	21	27
0	22	49	39	22	10
0	46	38	28	31	21
0	32	42	32	25	26
0	42	40	40	27	17
0	54	32	41	22	10
0	63	36	42	20	34
0	34	30	38	26	7
0	40	38	39	27	13
0	51	39	34	28	21
0	37	42	29	24	20
0	40	48	32	32	13
0	32	40	39	29	16
0	11	42	44	31	11
0	41	46	32	32	18
0	9	35	38	36	33
0	37	44	36	38	31
0	40	42	40	39	21
0	53				12
0	47				18
0	29				18
0	35				12
0	28
0	46
0	33
0	23
0	22
0	17
0	19
0	25
S7O
Activation with otdflp;UASstoptrpA1							Activation with otdflp;UASstopmSP
Receptivity %							Receptivity %
Virgin	Mated	VT058873AD;SPR8DBD x UASotdflp;STOPTRPA1	VT058873AD;Fru11/12DBD x UASotdflp;STOPTRPA1	VT058873ADAD;dsxDBD x UASotdflp;STOPTRPA1			Virgin	Mated	VT058873AD;SPR8DBD x otdflp.stopmsp	VT058873AD;Fru11/12DBD x otdflp.stopmsp	VT058873AD;dsxDBD x otdflp.msp
94 (N = 27)	3.22 (N = 27)	3.33 (N=30)	99 (N=30)	4 (N=30)			94 (N = 27)	3.22 (N = 27)	3 (N=30)		7 (N=30)
99 (N= 30)	4.11 (N= 30)	7 (N=30)	100 (N=30)	3.33 (N=30)			99 (N= 30)	4.11 (N= 30)	6 (N=30)		10 (N=30)
95 (N=28)	9.46 (N=28)	4 (N=30)	99 (N=30)	4 (N=30)			95 (N=28)	9.46 (N=28)	4 (N=30)		10 (N=30)
S7P
Activation with otdflp;UASstoptrpA1							Activation with otdflp;UASstopmSP
Oviposition							Oviposition
Virgin	Mated	VT058873AD;SPR8DBD x UASotdflp;STOPTRPA1	VT058873AD;Fru11/12DBD x UASotdflp;STOPTRPA1	VT058873ADAD;dsxDBD x UASotdflp;STOPTRPA1			Virgin	Mated	VT058873AD;SPR8DBD x otdflp.stopmsp	VT058873AD;Fru11/12DBD x otdflp.stopmsp	VT058873AD;dsxDBD x otdflp.msp
4	42	42	0	48			4	42	34	0	15
1	32	25	0	53			1	32	32	0	20
0	54	66	0	42			0	54	49	0	24
5	40	60	0	50			5	40	38	0	21
3	37	28	0	54			3	37	34	0	15
3	32	64	0	52			3	32	43	0	21
0	11	32	0	42			0	11	46	0	52
4	46	45	0	45			4	46	40	0	32
0	44	56	0	39			0	44	31	0	20
3	51	60	0	55			3	51	28	0	17
0	40	62	0	34			0	40	33	0	25
5	48		0	45			5	48	44	0	40
2	22		0	48			2	22	30	0	25
0	63		0	38			0	63	34	0	30
0	42		0	48			0	42	35	0
7	34		0	56			7	34	36	0
