# Supplementary material for: Sex peptide targets distinct higher order processing neurons in the brain to induce the female post-mating response
Source: eLife. 2026 Feb 10;13:RP98283. doi: 10.7554/eLife.98283 (PMC12890249; doi:10.7554/eLife.98283)
Supplement: Figure 9—source data 1. [file elife-98283-fig9-data1.xlsx]

## Sheet: Sheet1
Figure 9-source data 1: Quantitative results used to generate graphs in Figure 9A and B
								controls
Wildtype (Virgin)	Wildtype (Mated)	ppk GAL4 x UASmSP	SPR - ppk x UASmSP	SPR12 - ppk x UASmSP	Fru11/12 - ppk x UASmSP	nSybAD;ppkDBD>mSP		ppk GAL4	ppkDBD	SPR8 - ppk	SPR12 - ppk	fru11/12 - ppk
100	0	0	93.33	86.67	80	90		100	100	100	100	100
93.75	5.55	0	90.9	100	100	92		100	100	100	100	100
93.33	0	9.52	75	100	95	90		100	100	100	100	100
Wildtype (Virgin)	Wildtype (Mated)	ppk GAL4 x UASmSP	SPR - ppk x UASmSP	SPR12 - ppk x UASmSP	Fru11/12 - ppk x UASmSP	nSybAD;ppkDBD>mSP		ppk GAL4	ppkDBD	SPR8 - ppk	SPR12 - ppk	fru11/12 - ppk
0	12	9	0	0	0	0		0	0	0	0	0
0	46	24	0	0	0	3		0	0	0	0	0
1	21	24	0	0	0	0		2	0	0	0	0
0	56	17	0	0	0	11		0	0	1	0	0
0	51	21	0	0	0	2		0	0	0	0	0
0	21	0	0	35	0	0		0	0	0	0	0
0	51	13	0	0	5	0		1	0	0	0	0
1	48	20	52	0	0	1		0	0	0	0	0
0	53	7	0	18	0	0		0	0	0	0	0
0	30	27	0	0	0	0		0	0	0	0	0
0	23	51	0	5	0	0		0	1	0	0	0
0	29	67	0	0	0	0		0	0	1	0	0
0	51	63	0	0	0	7		0	0	0	0	0
1	33	55	0	0	0	0		0	0	0	0	0
0	44	65	0	0	1	0		0	1	0	0	0
0	40	17	0	0	1	0		0	0	0	0	0
0	16	31	0	0	0	0		0	1	0	0	0
0	71	20	0	0	0	0		0	0	0	0	0
0	58	22	0	24	10	10		2	0	0	0	0
0	26	84	0	0	12	0		0	0	0	0	0
0	55	23	0	0	0	0		0	0	0	1	0
0	47	35	0	0	0	0		0	0	0	0	0
1	21	17	0	0	0	0		0	0	0	0	0
0	56	9	0	0	0	0		0	0	0	0	0
0	49	51	0	2	9			0	4	0	0	0
0	44	35	0	37	0			0	0	0	0	0
1	31	23	0	0	0			0	0	0	1	0
0	26	29	0	0	0			0	0	0	0	0
0	31	4	0	0	0			1	0	0	0	0
0	45	11						0	0	0	0	0
