# Supplementary material for: Sex peptide targets distinct higher order processing neurons in the brain to induce the female post-mating response
Source: eLife. 2026 Feb 10;13:RP98283. doi: 10.7554/eLife.98283 (PMC12890249; doi:10.7554/eLife.98283)
Supplement: Figure 10—source data 1. [file elife-98283-fig10-data1.xlsx]

## Sheet: Sheet1
Figure 10-source data 1: Quantitative results used to generate graphs in Figure10A and B.
Line	Bloomington number	Expression	AD	DBD			Receptivity %
SS01491	86830	pC1-SS1	VT2002064 (attP40)	VT008469			Virgin	Mated	86830	86831	86832	86833	86837	86838	86839	86868	86869	66875
				(attP2)			94 (N = 27)	3.7 (N = 27)	80 (N = 20)	100 (N=20)	100 (N=20)	40 (N=20)	30 (N=20)	100	100	10	10	100
SS59911	86836	pC1-SS2	VT002064 (attP2)	Dsx-DBD			99 (N= 30)	6.66 (N= 30)	100 (N= 20)	100 (N=20)	100 (N=20)	50 (N=25)	20 (N=20)	100	70	10	30	100
SS50910	86834	SPSN-SS	VT058873 (attP40)	VT003280(spsn) (attP2)			95 (N=28)	3.5 (N=28)	90 (N=25)	100 (N=28)	100 (N=30)	38 (N=22)	34 (n=22)	100	70	15	40	100
SS50911	86870	SPSN	VT058873 (attP40)	VT033490 (attP2)
SS46540	86832	oviDN-SS1	VT050660 (attP40)	VT028160 (attP2)			Oviposition (UASMsp)
SS35666	86831	oviDN-SS2	VT026873 (attP40)	VT040574 (attP2)			Virgin	Mated	86830	86831	86832	86833	86837	86838	86839	86868	86869	66875
SS65426	86839	oviEN-SS1	VT043086 (attP40)	VT034612 (attP2)			0	48	8	0	8	1	0	0	0	1	3	0
SS49443	86833	oviEN-SS2	VT034612 (attP40)	VT050229 (attP2)			0	44	0	0	0	1	0	0	0	0	1	0
SS65422	86837	ovi-IN-SS1	R68A10 (attp40)	VT010054 (attp2)			0	42	5	0	5	0	0	1	0	0	1	0
SS65423	86838	oviIN-SS2	VT026347 (attP40)	VT026035 (attP2)			0	22	2	0	9	0	0	0	0	0	0	0
SS50200	86868	vpoDN-SS1	R31D07 (attP40)	R52F12 (attP2)			0	46	5	5	0	0	0	0	3	2	0	0
SS50795	86869	vpoDN-SS2	VT045670 (attP40)	R52F12 (attP2)			0	32	0	8	0	0	3	0	2	0	0	1
SS57877	86872	vpoIN-SS1	VT058716 (attP40)	VT008473 (attP2)			0	42	0	4	0	2	0	1	0	0	0	0
SS57878	86873	vpoIN-SS2	R12D09 (attP40)	VT008473 (attP2)			0	54	0	2	4	0	0	0	1	0	2	0
SS60199	86874	vpoEN-SS2	VT017181 (attP40)	VT002215 (attP2)			0	63	2	0	5	3	0	0	0	0	0	0
SS60200	86875	vpoEN-SS3	VT017181 (attP40)	VT006537 (attP2)			0	34	1	0	7	0	1	6	0	0	0	0
							0	40	4	0	8	0	0	0	0	1	1	1
							0	51	3	3	8	0	5	0	2	0	0	0
							0	37	0	4	5		0	0	1	0		0
							0	40	0	6	4			4	0	2
							0	32	0	3	5			0	0	0
							0	11	0	0	4			0	1
							0	41	2	0				1
							0	9
							0	37
							0	40
							0	53
							0	47
							0	29
							0	35
							0	28
							0	46
							0	33
							0	23
							0	22
							0	17
							0	19
							0	25
