# Supplementary material for: Sex peptide targets distinct higher order processing neurons in the brain to induce the female post-mating response
Source: eLife. 2026 Feb 10;13:RP98283. doi: 10.7554/eLife.98283 (PMC12890249; doi:10.7554/eLife.98283)
Supplement: Figure 11—source data 1. [file elife-98283-fig11-data1.xlsx]

## Sheet: Sheet1
Figure 11-source data 1: Quantitative results used to generate graphs in Figure 11A-F.
																		controls
Wildtype (Virgin)	Wildtype (Mated)	SPR8 - Fru11/12 x UASTNT	SPR8 - dsx x UASTNT	Fru11/12 - dsx x UASTNT	SPR8 - FD6 x UASTNT	Fru11/12 - FD6 x UASTNT	SPR8 - Fru11/12 x UASNaChBac	SPR8 - dsx x UASNaChBac	Fru11/12 - dsx x UASNaChBac	SPR8 - FD6 x UASNaChBac	Fru11/12 - FD6 x UASNaChBac	SPR8 - Fru11/12 x UAS Reaper UAS Hid	SPR8 - dsx x UAS Reaper UAS Hid	Fru11/12 - dsx x UAS Reaper UAS Hid	SPR8 - FD6 x UAS Reaper UAS Hid	Fru11/12 - FD6 x UAS Reaper UAS Hid		UAS TNT	UAS NaChBac	UAS Reaper UAS Hid
100	7.142	0	0	10	0	47.62	4.76	38.1	4.76	9.52	85.71	0	0	0	4.76	52.38		100	100	100
100	6.25	0	0	11.76	4.76	47.62	0	28.57	9.53	9.52	84.62	0	4.76	0	4.76	47.62		100	100	100
100	13.33	0	0	20	0	28.57	23.8	43.75	9.53	9.52	66.67	0	0	4.76	9.52	52.38		93.33	100	100
Wildtype (Virgin)	Wildtype (Mated)	SPR8 - Fru11/12 x UASTNT	SPR8 - dsx x UASTNT	Fru11/12 - dsx x UASTNT	SPR8 - FD6 x UASTNT	Fru11/12 - FD6 x UASTNT	SPR8 - Fru11/12 x UASNaChBac	SPR8 - dsx x UASNaChBac	Fru11/12 - dsx x UASNaChBac	SPR8 - FD6 x UASNaChBac	Fru11/12 - FD6 x UASNaChBac	SPR8 - Fru11/12 x UAS Reaper UAS Hid	SPR8 - dsx x UAS Reaper UAS Hid	Fru11/12 - dsx x UAS Reaper UAS Hid	SPR8 - FD6 x UAS Reaper UAS Hid	Fru11/12 - FD6 x UAS Reaper UAS Hid		UAS TNT	UAS NaChBac	UAS Reaper UAS Hid
0	45	45	15	15	0	19	56	4	34	5	0	27	24	13	3	32		0	0	0
0	41	29	19	0	35	34	39	50	16	10	0	32	51	8	18	0		0	0	0
1	41	14	11	12	43	11	45	23	5	0	0	19	46	0	15	14		0	0	0
1	20	32	37	19	9	21	30	0	17	21	0	38	48	23	12	25		0	0	0
0	36	26	13	53	13	0	53	0	61	61	0	24	33	3	27	0		0	0	0
1	39	39	8	1	35	26	56	0	49	24	0	37	0	16	0	0		0	0	0
1	22	41	32	4	8	7	38	0	49	19	0	19	21	17	36	0		0	0	2
0	55	35	51	1	7	3	37	20	85	51	0	60	59	33	49	0		0	0	0
0	15	19	3	11	16	0	20	19	8	25	0	43	43	46	12	0		0	0	0
0	31	23	41	27	41	0	0	16	26	29	0	42	44	5	23	0		0	0	1
1	38	35	29	25	1	14	37	0	53	47	0	41	34	10	1	0		0	0	0
0	30	15	35	9	5	10	37	0	36	44	0	11	23	0	0	0		0	0	0
0	27	16	34	0	2	18	31	13	54	25	0	31	47	34	5	2		0	0	0
0	59	16	29	0	2	19	37	28	26	1	0	0	0	46	0	7		0	0	0
0	44	11	14	6	4	22	46	0	27	32	0	1	6	0	6	0		0	0	1
0	32	48	19	4	1	14	13	28	6	24	0	36	55	1	4	0		0	0	0
0	56	48	20	31	0	7	67	24	48	11	0	42	17	61	0	0		0	0	1
6	12	44	43	27	7	27	15	11	47	21	0	1	48	0	1	45		0	0	0
0	38	19	6	8	26	54	3	0	41	1	0	3	0	21	7	0		0	0	0
0	23	21	44	0	13	3	49	11	53	1	0	44	23	51	1	0		0	0	0
0	33	32	15	11	13	24	58	19	52	0	0	26	0	49	19	0		1	0	0
0	53	40	17	8	13	28	35	23	62	1	0	11	26	23	28	39		0	0	0
0	14	21	12	0	42	54	1	12	5	41	0	52	0	45	13	0		0	0	0
0	40	22	22	1	34	22	51	0	49	22	0	14	21	17	32	0		0	0	0
1	33	28	21	0	31	43	43	33	46	18	0	37	27	15	24	31		0	0	0
0	25	15	35	10	17	45	36	29	56	39	0	42	0	0	52	43		1	0	0
0	28	43	22	0	41	38	64	0	21	36	0	36	4	1	43	0		0	0	0
0	41	29	27	15	46	57	33	6	35	21	0	16	27	0	40	0		0	0	0
0	55	40	2	35	4	27	28	13	19	62	0	17	0	15	41	0		0	0	0
1	43	20	31	43	37	29	42	7	41	9	0	19	0	0	36	0		0	0	0
